# Supplementary material for: Susceptibility to COVID-19 Nutrition Misinformation and Eating Behavior Change during Lockdowns: An International Web-Based Survey
Source: MDPI journal article supplement (doi:10.3390/nu15020451), 2023-01-14
Supplement: s1 [file s1]

**Table S3.** Sources of nutrition information and dietary advice listed in the survey questionnaire.

| <b>Interpersonal Sources of Information</b>         | <b>General Sources of Information</b>                      |
|-----------------------------------------------------|------------------------------------------------------------|
| A nurse or health coach                             | Blogs or podcasts                                          |
| A nutrition professional                            | Diet or health books                                       |
| Celebrity doctors or experts                        | Film or TV documentaries                                   |
| Family members, friends, colleagues or peers        | Google or Internet searches                                |
| Gym instructors or personal trainers                | Online news outlets or magazines                           |
| Influencers I follow on social media                | TV or radio news                                           |
| My own medical doctor or GP                         | Social media (Facebook, Twitter, etc.)                     |
| School, college or university teachers or lecturers | Private messages (WhatsApp, Viber, Messenger, etc.)        |
| Famous personalities, actors or presenters          | Nutrition or health websites                               |
| Nutrition scientists, PhDs and academics            | Official government websites (WHO, UNICEF, CDC, NHS, etc.) |
| Government officials                                | Scientific journals or science news publications           |
