# Supplementary material for: Susceptibility to COVID-19 Nutrition Misinformation and Eating Behavior Change during Lockdowns: An International Web-Based Survey
Source: MDPI journal article supplement (doi:10.3390/nu15020451), 2023-01-14
Supplement: s1 [file s1]

**Table S4.** Proportion of misinformed answers per source of dietary change.

1

| Misinformed Answers per Source of Dietary Change                                                 |                                                              |       |        |               |             |              |       |     |                                                             |
|--------------------------------------------------------------------------------------------------|--------------------------------------------------------------|-------|--------|---------------|-------------|--------------|-------|-----|-------------------------------------------------------------|
| Sources Used for Eating Behavior Change from Lowest to Highest Proportion of Misinformed Answers |                                                              | Never | Hardly | Occasion-ally | Repeat-edly | Continu-ally | WAVG* | SD  | Total Mis-informed Responses on All 25 State-ments <i>n</i> |
|                                                                                                  |                                                              | %     |        |               |             |              |       |     |                                                             |
| 1                                                                                                | My own medi-cal doctor or GP                                 | 24.7  | 27.1   | 29.1          | 33.4        | 41.2         | 33.8  | 1.4 | 12,728                                                      |
| 2                                                                                                | Nutrition sci-entists, PhDs and academics                    | 22.3  | 25.6   | 27.2          | 32.5        | 41.1         | 34.1  | 1.4 | 12,724                                                      |
| 3                                                                                                | A nutrition professional                                     | 22.4  | 26.6   | 28.1          | 33.4        | 41.3         | 34.8  | 1.4 | 12,747                                                      |
| 4                                                                                                | Government officials                                         | 25.1  | 24.9   | 31.6          | 34.4        | 44.8         | 35.5  | 1.6 | 12,746                                                      |
| 5                                                                                                | A nurse or health coach                                      | 23.2  | 27.7   | 30.7          | 37.4        | 43.5         | 35.6  | 1.5 | 12,687                                                      |
| 6                                                                                                | Scientific jour-nals or science news publica-tions           | 22.5  | 26.8   | 29.9          | 35.1        | 44.4         | 35.7  | 1.5 | 12,789                                                      |
| 7                                                                                                | Official gov-ernment web-sites (WHO, UNICEF, CDC, NHS, etc.) | 23.9  | 23.9   | 29.9          | 33.7        | 45.0         | 36.6  | 1.5 | 12,805                                                      |
| 8                                                                                                | Gym instruc-tors or per-sonal trainers                       | 24.6  | 30.3   | 32.5          | 38.1        | 49.2         | 37.4  | 1.7 | 12,693                                                      |
| 9                                                                                                | Family mem-bers, friends, colleagues or peers                | 23.4  | 27.4   | 32.7          | 41.9        | 48.6         | 37.8  | 1.8 | 12,777                                                      |
| 10                                                                                               | Celebrity doc-tors or experts                                | 23.8  | 30.0   | 30.9          | 40.0        | 49.4         | 38.0  | 1.8 | 12,679                                                      |
| 11                                                                                               | Nutrition or health web-sites                                | 21.5  | 25.6   | 30.4          | 37.7        | 48.3         | 38.1  | 1.7 | 12,792                                                      |
| 12                                                                                               | Film or TV documentaries                                     | 23.6  | 30.4   | 36.0          | 42.3        | 50.1         | 38.7  | 1.7 | 12,766                                                      |

|           |                                                     |      |      |      |      |      |      |     |        |
|-----------|-----------------------------------------------------|------|------|------|------|------|------|-----|--------|
| <b>13</b> | Google or Internet searches                         | 22.7 | 29.3 | 33.1 | 43.7 | 47.3 | 39.1 | 1.6 | 12,782 |
| <b>14</b> | Diet or health books                                | 22.4 | 27.5 | 31.3 | 39.7 | 50.5 | 39.2 | 1.8 | 12,792 |
| <b>15</b> | School, college or university teachers or lecturers | 23.5 | 28.4 | 34.5 | 43.6 | 49.1 | 39.5 | 1.7 | 12,671 |
| <b>16</b> | Blogs or podcasts                                   | 23.3 | 30.7 | 38.1 | 41.1 | 51.6 | 40.0 | 1.6 | 12,792 |
| <b>17</b> | Influencers I follow on social media                | 23.9 | 30.4 | 35.9 | 46.9 | 50.9 | 41.1 | 1.8 | 12,774 |
| <b>18</b> | TV or radio news                                    | 23.9 | 29.9 | 36.1 | 44.0 | 52.6 | 41.2 | 1.9 | 12,681 |
| <b>19</b> | Online news outlets or magazines                    | 23.9 | 30.7 | 36.3 | 47.0 | 53.6 | 42.4 | 1.9 | 12,766 |
| <b>20</b> | Social media (Facebook, Twitter, etc.)              | 23.7 | 31.9 | 37.8 | 46.6 | 52.5 | 42.5 | 1.7 | 12,756 |
| <b>21</b> | Famous personalities, actors or presenters          | 25.0 | 32.7 | 38.4 | 46.8 | 55.4 | 42.7 | 1.9 | 12,653 |
| <b>22</b> | Private messages (WhatsApp, Viber, Messenger, etc.) | 24.0 | 33.6 | 38.8 | 47.7 | 51.1 | 42.9 | 1.7 | 12,755 |

\* The ranking of sources used for eating behavior change from lowest to highest proportion of misinformed answers is based on weighted averages of frequencies per source calculated on the scale 'never' (0), 'hardly' (1), 'occasionally' (2), 'repeatedly' (3), and 'continually' (4).

2  
3  
4
