# Supplementary material for: Susceptibility to COVID-19 Nutrition Misinformation and Eating Behavior Change during Lockdowns: An International Web-Based Survey
Source: MDPI journal article supplement (doi:10.3390/nu15020451), 2023-01-14
Supplement: s1 [file s1]

**Table S1.** General characteristics of the study participants.

1

|                             | <b>Variables</b>                            | <b><i>n</i></b> | <b>%</b> |
|-----------------------------|---------------------------------------------|-----------------|----------|
| <b>Age</b>                  | 18-20                                       | 77              | 2.3      |
|                             | 21-25                                       | 268             | 7.9      |
|                             | 26-30                                       | 364             | 10.7     |
|                             | 31-35                                       | 403             | 11.8     |
|                             | 36-40                                       | 436             | 12.8     |
|                             | 41-45                                       | 381             | 11.2     |
|                             | 46-50                                       | 426             | 12.5     |
|                             | 51-55                                       | 412             | 12.1     |
|                             | 56-60                                       | 280             | 8.2      |
|                             | 61-65                                       | 201             | 5.9      |
|                             | 66-70                                       | 104             | 3.0      |
|                             | 70 or older                                 | 64              | 1.9      |
| <b>Gender</b>               | Male                                        | 705             | 20.8     |
|                             | Female                                      | 2,666           | 78.5     |
|                             | Other                                       | 3               | 0.1      |
|                             | Prefer not to say                           | 24              | 0.7      |
| <b>Employment status</b>    | Employed, working 40 or more hours per week | 929             | 28.2     |
|                             | Employed, working 1-39 hours per week       | 1,232           | 37.4     |
|                             | Not employed, looking for work              | 457             | 13.9     |
|                             | Not employed, NOT looking for work          | 370             | 11.2     |
|                             | Retired                                     | 240             | 7.3      |
|                             | Disabled, not able to work                  | 66              | 2.0      |
| <b>Country of residence</b> | United Kingdom                              | 1,362           | 40.3     |
|                             | United States                               | 489             | 14.5     |
|                             | India                                       | 293             | 8.7      |
|                             | Canada                                      | 166             | 4.9      |
|                             | Australia                                   | 134             | 4.0      |
|                             | Ireland                                     | 88              | 2.6      |
|                             | Pakistan                                    | 64              | 1.9      |
|                             | South Africa                                | 55              | 1.6      |
|                             | Egypt                                       | 47              | 1.4      |

|                                         | Variables                                               | <i>n</i> | %    |
|-----------------------------------------|---------------------------------------------------------|----------|------|
|                                         | Nigeria                                                 | 43       | 1.3  |
|                                         | Spain                                                   | 34       | 1.0  |
|                                         | United Arab Emirates                                    | 31       | 0.9  |
|                                         | New Zealand                                             | 30       | 0.9  |
|                                         | Bangladesh                                              | 23       | 0.7  |
|                                         | Philippines                                             | 21       | 0.6  |
|                                         | Ethiopia                                                | 18       | 0.5  |
|                                         | France                                                  | 18       | 0.5  |
|                                         | Malaysia                                                | 18       | 0.5  |
|                                         | Kenya                                                   | 17       | 0.5  |
|                                         | Netherlands                                             | 17       | 0.5  |
|                                         | Germany                                                 | 16       | 0.5  |
|                                         | Singapore                                               | 16       | 0.5  |
|                                         | Italy                                                   | 15       | 0.4  |
|                                         | Nepal                                                   | 15       | 0.4  |
|                                         | Russian Federation                                      | 15       | 0.4  |
|                                         | Indonesia                                               | 12       | 0.4  |
|                                         | Mexico                                                  | 11       | 0.3  |
|                                         | Sweden                                                  | 11       | 0.3  |
|                                         | Turkey                                                  | 11       | 0.3  |
|                                         | Other 95 countries                                      | 293      | 8.8  |
| <b>Physical and digital books owned</b> | 0-9                                                     | 348      | 10.2 |
|                                         | 10-99                                                   | 1,311    | 38.4 |
|                                         | 100-499                                                 | 1,213    | 35.5 |
|                                         | 500-999                                                 | 343      | 10.0 |
|                                         | 1000 or more                                            | 202      | 5.9  |
| <b>Current diet</b>                     | I only eat animal foods                                 | 10       | 0.3  |
|                                         | I only eat plant foods                                  | 414      | 12.2 |
|                                         | I predominantly eat plant foods, plus some animal foods | 1,109    | 32.7 |
|                                         | I predominantly eat animal foods, plus some plant foods | 201      | 5.9  |
|                                         | I eat a balance of plant foods and animal foods         | 1,658    | 48.9 |

|                                                                    | Variables       | <i>n</i> | %    |
|--------------------------------------------------------------------|-----------------|----------|------|
| <b>Self-reported health</b>                                        | Very poor       | 23       | 0.9  |
|                                                                    | Poor            | 47       | 1.8  |
|                                                                    | Somewhat good   | 365      | 13.6 |
|                                                                    | Good            | 1,285    | 47.7 |
|                                                                    | Great           | 973      | 36.1 |
| <b>Increased interest in nutrition since the COVID-19 outbreak</b> | Yes             | 1,525    | 56.1 |
|                                                                    | No              | 1,196    | 44.0 |
| <b>Being a nutrition professional</b>                              | Yes             | 636      | 23.4 |
|                                                                    | No              | 1,390    | 51.1 |
|                                                                    | Studying for it | 697      | 25.6 |
