# Supplementary material for: Susceptibility to COVID-19 Nutrition Misinformation and Eating Behavior Change during Lockdowns: An International Web-Based Survey
Source: MDPI journal article supplement (doi:10.3390/nu15020451), 2023-01-14
Supplement: s1 [file s1]

**Table S2.** Statements related to COVID-19 used in the survey questionnaire.

1

| Number | Statement                                                                                                                                                                        | Description                                                                              |
|--------|----------------------------------------------------------------------------------------------------------------------------------------------------------------------------------|------------------------------------------------------------------------------------------|
| S1     | Because the alcohol in Vodka acts as a steriliser, taking a few sips can kill COVID-19 viruses sitting in the throat.                                                            | Unfounded or unproven claim                                                              |
| S2     | The COVID-19 virus cannot resist heat and dies when exposed to temperatures above 40°C (104°F). Therefore, sipping hot beverages like tea and broth can help neutralise it.      | Unfounded or unproven claim                                                              |
| S3     | Drinking water flushes all COVID-19 viral particles into the oesophagus and then the stomach, where they will be completely disintegrated by gastric acid.                       | Unfounded or unproven claim                                                              |
| S4     | You can protect yourself from the novel coronavirus by gargling bleach.                                                                                                          | Unfounded or unproven claim of concern                                                   |
| S5     | Gargling with warm water and salt, apple cider vinegar, or lemon in hot water can eliminate the novel coronavirus from your throat.                                              | Unfounded or unproven claim                                                              |
| S6     | Gargling with Listerine mouthwash can help reduce the risk of novel coronavirus infection due to its proven antiviral and antiseptic properties.                                 | Unfounded or unproven claim                                                              |
| S7     | The antiviral properties of garlic and ginger have protective effects against COVID-19.                                                                                          | Unfounded or unproven claim                                                              |
| S8     | It has been proven that taking 12 grams (12,000 mg) of concentrated vitamin C daily can help remedy a COVID-19 infection.                                                        | Unfounded or unproven claim of concern                                                   |
| S9     | Antiviral herbs and spices like chilli boost immunity and may help prevent novel coronavirus infection.                                                                          | Unfounded or unproven claim                                                              |
| S10    | Taking high-dose vitamin C and D supplements will stop you from catching COVID-19.                                                                                               | Unfounded or unproven claim                                                              |
| S11    | Immune-boosting supplements like zinc, green tea, oregano oil, Chaga mushroom blends, cow urine, bear bile, and echinacea have been shown to stop a COVID-19 infection.          | Unfounded or unproven claim                                                              |
| S12    | While the risk is extremely low, undercooked meat contaminated with active COVID-19 viral particles could be a potential source of novel coronavirus transmission.               | WHO precaution at the time (21 Feb 2020) [107]                                           |
| S13    | Ingesting colloidal silver drops can increase the number of immune cells in the body and disintegrate some strains of coronavirus within 12 hours.                               | Unfounded or unproven claim of concern                                                   |
| S14    | Cold drinks and cold foods such as ice-cream help the novel coronavirus remain active in your body for longer, so it is important to avoid these.                                | Unfounded or unproven claim                                                              |
| S15    | Keep your mouth and throat always moist, as saliva can encapsulate and deactivate the COVID-19 virus.                                                                            | Unfounded or unproven claim                                                              |
| S16    | When your daily intake of vitamin C adequately supports your immune system, it might help you recover faster from COVID-19 than if you were deficient in this essential vitamin. | Essentiality of nutrients [57]; Vitamin C status before [161] and during [162] infection |

|     |                                                                                                                                                                                                                      |                                                 |
|-----|----------------------------------------------------------------------------------------------------------------------------------------------------------------------------------------------------------------------|-------------------------------------------------|
|     |                                                                                                                                                                                                                      | may play a mitigating role [163]                |
| S17 | It has been shown that the novel coronavirus is foodborne and transmitted through the consumption of meat, even when the meat has been thoroughly cooked.                                                            | Unfounded or unproven claim                     |
| S18 | To reduce the risk of transmission of coronaviruses through food, the consumption of raw meat, raw milk, or undercooked animal products should be avoided, especially during the peak of an outbreak.                | WHO precaution at the time (21 Feb 2020) [107]  |
| S19 | It is safe to eat fruits and vegetables that have been washed with soap or diluted bleach to remove potential COVID-19 viral particles.                                                                              | Unfounded or unproven claim of concern          |
| S20 | Oreganol P73, from oregano oil, has a direct killing effect and ability to stop replication of the novel coronavirus in vitro.                                                                                       | Unfounded or unproven claim                     |
| S21 | To reduce the risk of COVID-19 infection, try to avoid direct contact with the person delivering groceries or packages, and wash your hands thoroughly after bringing in packages or grocery deliveries.             | WHO precaution at the time (7 April 2020) [164] |
| S22 | Eating non-acidic (i.e. alkaline) foods that have a pH level higher than the novel coronavirus (that is, above 8.5) can help neutralise it.                                                                          | Unfounded or unproven claim                     |
| S23 | Ketosis achieved through high-fat, low-carbohydrate ketogenic eating helps activate immune T-cells in the lungs and provides a higher survival chance against the novel coronavirus than a carbohydrate-loaded diet. | Unfounded or unproven claim                     |
| S24 | Only people who eat meat are affected by the novel coronavirus.                                                                                                                                                      | Unfounded or unproven claim                     |
| S25 | A plant-based diet providing a variety of fruits and vegetables, herbs and spices, wholegrains, legumes, nuts, and seeds can provide immunity against the novel coronavirus and help ‘flatten the curve’.            | Unfounded or unproven claim                     |

## References

57. European Food Safety Authority. Guidance on the Scientific Requirements for Health Claims Related to the Immune System, the Gastrointestinal Tract and Defence against Pathogenic Microorganisms. *EFSA J.* **2016**, *14*, doi:10.2903/J.EFSA.2016.4369. 2
107. World Health Organization. Coronavirus Disease 2019 (COVID-19): Situation Report, 32. Available online: <https://apps.who.int/iris/bitstream/handle/10665/331686/nCoVsitrep02Apr2020-eng.pdf> (accessed on 14 December 2022). 3
161. Ajdžanović, V.; Filipović, B.; Šošić-Jurjević, B.; Miler, M.; Milošević, V. Margins of Beneficial Daily Dosage of Supplements in Prevention of COVID-19. *EXCLI J.* **2021**, *20*, 828, doi:10.17179/EXCLI2021-3790. 4
162. Lewis, S.L.; Chizmar, L.R.; Liotta, S. COVID-19 and Micronutrient Deficiency Symptoms – Is There Some Overlap? *Clin. Nutr. Espen* **2022**, *48*, 275, doi:10.1016/j.CLNESP.2022.01.036. 5
163. Gombart, A.F.; Pierre, A.; Maggini, S. A Review of Micronutrients and the Immune System—Working in Harmony to Reduce the Risk of Infection. *Nutr. 2020, Vol. 12, Page 236* **2020**, *12*, 236, doi:10.3390/NU12010236. 6
164. World Health Organization. COVID-19 and Food Safety: Guidance for Food Businesses. Available online: <https://www.who.int/publications/i/item/covid-19-and-food-safety-guidance-for-food-businesses> (accessed on 14 December 2022). 7
